# Supplementary material for: The landscape of cardiovascular care in pediatric cancer patients and survivors: a survey by the ACC Pediatric Cardio-Oncology Work Group
Source: Springer Nature journal article supplement (doi:10.1186/s40959-019-0051-8), 2019-10-23
Supplement: 40959_2019_51_MOESM1_ESM.pdf [file 40959_2019_51_MOESM1_ESM.pdf]

Questions for *Pediatric Cardio-oncology Practice Survey*:

**Demographic**

1. What is your job designation?
  - a. Physician
  - b. Advanced Practice Nurse
  - c. Physician Assistant
  - d. Nurse
  - e. Other
  
2. Which of the following best applies to your practice environment?
  - a. Academically affiliated
  - b. Owned by a corporation
  - c. Privately owned
  - d. Owned by a hospital or large insurer
  - e. None of the above apply
  
3. Who is responsible for managing cardio-oncology\* issues (inpatient and/or outpatient) at your institution?
  - a. Dedicated cardio-oncology service
  - b. Pediatric cardiologist(s)
  - c. Pediatric oncologist(s)
  - d. Shared between Pediatric Cardiology and Oncology
  - e. Adult Cardio-Oncology specialist
  - f. Other (write in)
  - g. Unknown

\*This may include, but is not limited to, patients before, during, or after exposure to chemotherapy and/or radiation therapy with: symptomatic heart failure, asymptomatic ventricular dysfunction, pericardial effusion, ECG changes, arrhythmia, chest pain.

**Patient Population**

4. Which of the following patient populations are referred for assessment by a Cardiologist at your institution?
  - a. All anthracycline exposure
  - b. All chemotherapy exposure, regardless of type
  - c. All radiation exposure, regardless of chemotherapy
  - d. Abnormal testing (ECG, echocardiogram, etc.) in patients after cancer treatment
  - e. None of the above apply
  - f. Unknown

5. Which of the following patients are seen for Cardio-Oncology in your institution (any stage of therapy)?
  - a. Pediatric only
  - b. Pediatric and adult
  - c. Does not apply
  - d. Unknown

### Surveillance Practices

6. Does practice at your institution include screening of patients prior to or during cancer treatment?
  - a. Yes, all patients prior to therapy
  - b. Yes, all patients once therapy is started
  - c. Yes, but only if included in treatment protocol
  - d. No
  - e. Unknown
7. If the answer to #6 above was “a,” “b,” or “c,” which of the following are *regularly* used? Please check all that apply.
  - a. ECG
  - b. Extended arrhythmia monitoring (Holter, etc.)
  - c. Echocardiogram, standard (includes shortening fraction and/or ejection fraction)
  - d. Echocardiogram, advanced (includes diastolic parameters, strain imaging, stress)
  - e. Cardiac MRI
  - f. Radionuclide imaging (MUGA)
  - g. Cardiopulmonary exercise testing
  - h. Serum biomarkers
  - i. Evaluation by a cardiologist
  - j. Other (write in)
  - k. None
8. If patients are followed regularly prior to or during cancer treatment, how is the evaluation interval determined?
  - a. Children’s Oncology Group (COG) recommendation for screening in survivors
  - b. Chemotherapy protocol, when there are surveillance guidelines included
  - c. Other literature
  - d. Similar to other “at risk” or cardiomyopathy populations
  - e. Unknown
9. At your institution, is a cardiologist involved in decisions to use cardioprotective agents (e.g. dexrazoxane) or to alter therapy for cardiac-specific concerns?
  - a. Yes, all patients
  - b. Yes, some patients as determined by Oncology
  - c. No
  - d. Unknown

10. Does your institution have a clinic for patients after cancer treatment (“survivor” clinic)?
- e. Yes, with Cardiology embedded
  - f. Yes, without Cardiology embedded
  - g. No
  - h. Unknown
11. Which of the following are used in assessing patients after cancer treatment (“survivors”)? Please check all that apply.
- a. ECG
  - b. Extended arrhythmia monitoring (Holter, etc.)
  - c. Echocardiogram, standard (includes shortening fraction and/or ejection fraction)
  - d. Echocardiogram, advanced (includes diastolic parameters, strain imaging, stress)
  - e. Cardiac MRI
  - f. Radionuclide imaging (MUGA)
  - g. Cardiopulmonary exercise testing
  - h. Evaluation by a Cardiologist
  - i. Other
  - j. None
  - k. Unknown
12. At your institution, when is a patient after cancer treatment (“survivors”) seen by a cardiologist?
- a. At all COG-recommended surveillance intervals
  - b. Only when an abnormality is found on COG-recommended testing
  - c. Only with symptomatic heart failure
  - d. Pregnancy
  - e. Other
  - f. None of the above apply
  - g. Unknown
13. At your institution, are exercise recommendations provided for patients after cancer treatment (“survivors”)?
- a. Aerobic exercise, but not isometric/weightlifting, is restricted
  - b. Isometric/weightlifting, but not aerobic exercise, is restricted
  - c. All exercise is restricted
  - d. Exercise prescription is tailored to specific patient needs and cardiac health
  - e. There is no discussion of exercise recommendations or limitations
  - f. None of the above apply
  - g. Unknown

14. Considering cardiovascular health in patients after cancer treatment (“survivors”), which of the following issues are addressed by a cardiologist? Please check all that apply.
- a. Ventricular function
  - b. Blood pressure
  - c. Lipids
  - d. Diet, exercise, weight loss
  - e. Other cardiovascular risk factors (obesity, smoking, etc.)
  - f. Coronary artery health
  - g. None
  - h. Unknown

### **Management Practices**

15. Regarding the decision to treat ventricular systolic dysfunction in patients before, during, or after cancer treatment, which of the following parameters are used to determine when to start therapy?
- a. Left ventricular shortening fraction (LVSF)
  - b. Left ventricular ejection fraction (LVEF)
  - c. Strain value regardless of LVSF or LVEF
  - d. A, B, or C if any is abnormal
  - e. Other
  - f. Unknown
16. Regarding patients with ventricular dysfunction before, during, or after cancer treatment, which of the following medications do you prescribe? Check all that apply.
- a. Angiotensin converting enzyme inhibitor (or angiotensin receptor blocker)
  - b. Beta blocker
  - c. Mineralocorticoid receptor blocker
  - d. Statin
  - e. Diuretics
  - f. Other
  - g. Unknown
17. Does your institution offer heart transplantation?
- a. Yes, including to patients after cancer treatment (see question #18)
  - b. Yes, excluding patients after cancer treatment
  - c. No
18. If the answer to #17 above is “A” what is the minimum time off therapy or in remission to qualify for heart transplantation? Please pick the option that is most appropriate.
- a. > 1 year
  - b. >2 years
  - c. >5 years
  - d. Does not apply
  - e. Unknown

19. Does your institution implant ventricular assist devices (VAD)?
- a. Yes, including to patients after cancer treatment (see question #20)
  - b. Yes, excluding patients after cancer treatment
  - c. No
20. If the answer to #19 above is "A" what is the minimum time off therapy or in remission to qualify for VAD? Please pick the option that is most appropriate.
- a. > 1 year
  - b. >2 years
  - c. >5 years
  - d. No minimum
  - e. Does not apply
  - f. Unknown
